# Supplementary material for: Detecting Splicing Variants in Idiopathic Pulmonary Fibrosis from Non-Differentially Expressed Genes
Source: PLoS One. 2013 Jul 2;8(7):e68352. doi: 10.1371/journal.pone.0068352 (PMC3699530; doi:10.1371/journal.pone.0068352)
Supplement: Table S3 — Analysis results of differential expression and differential splicing of 35 genes with novel transcripts. (XLS) [file pone.0068352.s004.xls]

## Sheet: DE_DS_GenesWithNovelTrans
GeneID	Gene Name	DE_Fold Change	DS_ChiSquare p_value	DS_ChiSquareFDR
ENSG00000213463	SYNJ2BP	0.771561	1.98727e-22	5.2138e-20
ENSG00000152404	CWF19L2	0.771473	7.42156e-10	6.67227e-08
ENSG00000105402	NAPA	1.44317	7.63826e-10	6.67227e-08
ENSG00000179583	CIITA	1.6559	1.04256e-08	6.812e-07
ENSG00000186635	ARAP1	1.13746	6.91481e-08	3.62084e-06
ENSG00000166825	ANPEP	1.12734	1.20556e-07	5.28367e-06
ENSG00000117523	BAT2D1	0.755273	1.73876e-06	6.51257e-05
ENSG00000116514	RNF19B	1.05921	3.39724e-06	9.694e-05
ENSG00000074755	ZZEF1	0.778113	3.43577e-06	9.694e-05
ENSG00000160584	SIK3	0.782705	4.02085e-06	9.694e-05
ENSG00000169682	SPNS1	1.08779	4.07202e-06	9.694e-05
ENSG00000188191	PRKAR1B	1.40671	9.17536e-06	0.00020043
ENSG00000145555	MYO10	0.471579	1.36581e-05	0.000258725
ENSG00000141480	ARRB2	1.22373	1.57035e-05	0.000258725
ENSG00000147804	AF205589.2	1.59558	1.57526e-05	0.000258725
ENSG00000111684	U47924.1	1.22678	2.79425e-05	0.000429988
ENSG00000136048	DRAM1	0.980302	3.99163e-05	0.000580767
ENSG00000089154	GCN1L1	0.968095	0.000684968	0.00943568
ENSG00000153815	AC099524.1	0.87774	0.000735456	0.00943568
ENSG00000168096	ANKS3	1.26473	0.000756295	0.00943568
ENSG00000196187	TMEM63A	0.881497	0.00108684	0.0129433
ENSG00000117408	IPO13	1.05651	0.00171472	0.0173487
ENSG00000243649	CFB	2.52618	0.00172162	0.0173487
ENSG00000185324	CDK10	1.31604	0.00265929	0.0253188
ENSG00000140416	TPM1	0.765504	0.00339372	0.0306605
ENSG00000162729	IGSF8	0.947513	0.00371742	0.0317152
ENSG00000150977	RILPL2	0.925378	0.00375256	0.0317152
ENSG00000082397	EPB41L3	0.805687	0.00442682	0.0362446
ENSG00000171475	WIPF2	0.758388	0.00473188	0.0375683
ENSG00000141349	G6PC3	1.09195	0.00488693	0.0376581
ENSG00000111726	CMAS	0.871995	0.00520405	0.0389561
ENSG00000251322	SHANK3	0.640571	0.00552784	0.0397495
ENSG00000103326	SOLH	1.26065	0.00561743	0.0397495
ENSG00000157637	SLC38A10	1.20814	0.00576519	0.0397495
ENSG00000171204	TMEM126B	1.19918	0.00694742	0.0466724

## Sheet: NovelTrans_FC
geneName	isoID	DE_Fold Change
AC099524.1	ENST00000398040_N	117.667
AC099524.1	ENST00000398040	0.786478
AF205589.2	ENST00000276833	1.4881
AF205589.2	ENST00000276833_N	0.369565
AF205589.2	ENST00000301305	3.12109
AF205589.2	ENST00000301305_N	0.689775
ANKS3	ENST00000304283	1.0555
ANKS3	ENST00000450067	6.92683
ANPEP	ENST00000300060	0.687828
ANPEP	ENST00000300060_N	3.83864
ARAP1	ENST00000334211	0.411451
ARAP1	ENST00000359373_N	84.75
ARAP1	ENST00000427971	2.73104
ARAP1	ENST00000465814_N	3.95833
ARAP1	ENST00000455638_N	214
ARAP1	ENST00000334211_N	0.758003
ARAP1	ENST00000452383	0.430905
ARAP1	ENST00000465814	2.24671
ARAP1	ENST00000359373	54.4706
ARAP1	ENST00000452383_N	0.956679
ARAP1	ENST00000427971_N	8.75325
ARAP1	ENST00000455638	557
ARRB2	ENST00000412477_N	9.59394
ARRB2	ENST00000381488_N_N	1.15476
ARRB2	ENST00000412477	4.33696
ARRB2	ENST00000381488_N	2.5641
ARRB2	ENST00000269260	0.0185185
ARRB2	ENST00000346341_N	1.36755
ARRB2	ENST00000269260_N_N	0.0147493
ARRB2	ENST00000346341	0.538136
ARRB2	ENST00000412477_N_N	4.5508
ARRB2	ENST00000346341_N_N	0.556209
ARRB2	ENST00000381488	1.34545
BAT2D1	ENST00000426496	0.308943
BAT2D1	ENST00000392080	0
BAT2D1	ENST00000412837	2.86792
BAT2D1	ENST00000498596	0.673267
BAT2D1	ENST00000492811	0.627172
BAT2D1	ENST00000495585_N	0.781857
BAT2D1	ENST00000476522	2.98438
BAT2D1	ENST00000498596_N	1.08291
BAT2D1	ENST00000392080_N	0
BAT2D1	ENST00000483654	1.08966
BAT2D1	ENST00000412837_N	2.84615
BAT2D1	ENST00000483654_N	1.11852
BAT2D1	ENST00000495585	0.81069
CDK10	ENST00000472018	1.36458
CDK10	ENST00000502547	303
CDK10	ENST00000510811	1.45471
CDK10	ENST00000508723	0.166981
CDK10	ENST00000437260_N_N	798
CDK10	ENST00000393082	0
CDK10	ENST00000511415	0.797468
CDK10	ENST00000503560	1.55046
CDK10	ENST00000505473_N	0.135325
CDK10	ENST00000514965	1.34251
CDK10	ENST00000505473	0.839036
CDK10	ENST00000505473_N_N	327
CFB	ENST00000482312	3.26504
CFB	ENST00000425368	1.3273
CFB	ENST00000483004	7.98732
CFB	ENST00000461483	3.50948
CFB	ENST00000467150	0
CFB	ENST00000425368_N	0.0268456
CFB	ENST00000498317	4.09309
CFB	ENST00000452035_N	0
CFB	ENST00000452035	3.21318
CFB	ENST00000467360	9.7037
CFB	ENST00000472581	1.22393
CFB	ENST00000475617	1.73737
CFB	ENST00000482886	2.29649
CIITA	ENST00000381835	1.29855
CIITA	ENST00000381835_N	187
CIITA	ENST00000388910	0.97416
CIITA	ENST00000324288	0.874814
CIITA	ENST00000388910_N	306
CIITA	ENST00000324288_N	8.34328
CMAS	ENST00000229329	1.09363
CMAS	ENST00000229329_N	0.401372
CWF19L2	ENST00000282251_N	2.16
CWF19L2	ENST00000282251	0.389908
DRAM1	ENST00000258534_N_N_N	3.18893
DRAM1	ENST00000258534_N_N	0.630109
DRAM1	ENST00000258534	0.898367
EPB41L3	ENST00000400111	0.253333
EPB41L3	ENST00000341928	1.30112
EPB41L3	ENST00000341928_N	1.04348
EPB41L3	ENST00000427684	1.09781
EPB41L3	ENST00000427684_N	0.386647
G6PC3	ENST00000269097	0.725173
G6PC3	ENST00000269097_N	1.73529
GCN1L1	ENST00000300648	0.848273
GCN1L1	ENST00000300648_N	33.75
IGSF8	ENST00000368086	88.5
IGSF8	ENST00000314485_N	1.60077
IGSF8	ENST00000460351	0.286408
IGSF8	ENST00000314485	0.728721
IPO13	ENST00000372343_N	0.0537634
IPO13	ENST00000489061	0.51277
IPO13	ENST00000486876	1.34241
IPO13	ENST00000372339	1.60784
IPO13	ENST00000372343	0.930576
IPO13	ENST00000483886	25.3043
IPO13	ENST00000489773	10.75
IPO13	ENST00000480902	1.07094
MYO10	ENST00000515803	0.289438
MYO10	ENST00000513610_N	0.00628931
MYO10	ENST00000427430	0.258503
MYO10	ENST00000502436	0
MYO10	ENST00000513610	0.594634
NAPA	ENST00000263354	0.922541
NAPA	ENST00000263354_N	273.25
PRKAR1B	ENST00000406797_N	790
PRKAR1B	ENST00000400758	0.349693
PRKAR1B	ENST00000406797	1.05786
PRKAR1B	ENST00000478198	1.12418
PRKAR1B	ENST00000417852	0.766304
RILPL2	ENST00000280571	0.839842
RILPL2	ENST00000280571_N	432
RNF19B	ENST00000356990	2.69643
RNF19B	ENST00000373456_N	671
RNF19B	ENST00000235150	114.5
RNF19B	ENST00000373456	0.777095
SHANK3	ENST00000503869_N_N	0.672451
SHANK3	ENST00000503869	0.00719424
SHANK3	ENST00000503869_N	0.862069
SIK3	ENST00000445177	5.59649
SIK3	ENST00000375300	0.00529101
SIK3	ENST00000446921	0.505906
SIK3	ENST00000292055	0.135593
SIK3	ENST00000488337	0.982051
SIK3	ENST00000375300_N	0
SIK3	ENST00000480468	0.651429
SIK3	ENST00000465421	0.481013
SIK3	ENST00000445177_N	5.4
SIK3	ENST00000446921_N	0.491071
SIK3	ENST00000472648	0
SLC38A10	ENST00000288439	0.379121
SLC38A10	ENST00000288439_N	1.93418
SLC38A10	ENST00000374759	0.492063
SLC38A10	ENST00000374759_N	1.58122
SOLH	ENST00000397687	3.1034
SOLH	ENST00000219611	0.696133
SOLH	ENST00000219611_N	1.07826
SPNS1	ENST00000352260	0.3
SPNS1	ENST00000323081_N	0.634656
SPNS1	ENST00000323081	0.522894
SPNS1	ENST00000452515_N	3.74336
SPNS1	ENST00000434933_N	1.52381
SPNS1	ENST00000434933	1.29189
SPNS1	ENST00000452515	3.27805
SPNS1	ENST00000311008_N	102
SPNS1	ENST00000311008	105
SYNJ2BP	ENST00000256366_N	319
SYNJ2BP	ENST00000256366	0.258224
TMEM126B	ENST00000393375	0.88003
TMEM126B	ENST00000418327	0.588235
TMEM126B	ENST00000358867	2.81106
TMEM126B	ENST00000304524	2.81106
TMEM126B	ENST00000418327_N	168
TMEM63A	ENST00000366835_N	701.5
TMEM63A	ENST00000483779	1.18764
TMEM63A	ENST00000482753	2.03618
TMEM63A	ENST00000436966	0.0606061
TMEM63A	ENST00000487971	1.83967
TMEM63A	ENST00000496025	1.78221
TMEM63A	ENST00000366835	0.694719
TMEM63A	ENST00000474478	0.954619
TPM1	ENST00000404484	1.26185
TPM1	ENST00000288398	0.436681
TPM1	ENST00000334895	0.930305
TPM1	ENST00000267996	0.358913
TPM1	ENST00000357980	0.3939
U47924.1	ENST00000261407_N	252
U47924.1	ENST00000261407	1.02401
WIPF2	ENST00000323571	0.744167
WIPF2	ENST00000494757	1.10638
WIPF2	ENST00000494757_N	0.00328947
ZZEF1	ENST00000381638_N	4.83582
ZZEF1	ENST00000381638	0.533679
ZZEF1	ENST00000414864	0.514778
