# Supplementary material for: Detecting Splicing Variants in Idiopathic Pulmonary Fibrosis from Non-Differentially Expressed Genes
Source: PLoS One. 2013 Jul 2;8(7):e68352. doi: 10.1371/journal.pone.0068352 (PMC3699530; doi:10.1371/journal.pone.0068352)
Supplement: Table S6 — Primers used in qRT-PCR validation study. (XLS) [file pone.0068352.s007.xls]

## Sheet: Validated Transcripts
	Gene Name	Transcript ID	Position	Forward Primer	Reverse Primer
	TOM1L1	ENST0000445275	1-121	5’-CAGCTCCTCACGCTCGGTGC-3’	5’-ACTCCACCCGCTCGGTACCC-3’
	TOM1L1 common	ENST0000445275	1446-1588	5'-TGCCCAGCAATCATCCAGCGA-3'	5'-AGCTCCTTTGTGCTGGTGAGCA-3'
	CMTM4	ENST0000330687	741-877	5’-TACATCCGAGCCCGCACGGA-3’	5’-TGCCAGTGATTCAAACTCAGCAGGT-3’
	PEX11B	ENST0000369306	229-338	5’-CGGCTGTCATGGACGCCTGG-3’	5’-CCTCTGCAGCGCATGGCCAA-3’
	PEX11B common	ENST0000369306	1499-1621	5'-TGTGCCAGTGGACTCTTCCCT-3'	5'-AGGTGTACAAGGAAGGATAAGGGCC-3'
	SLC38A10	ENST00000374759_N ENST00000288439_N	68-184	5’-CCCTCCCAGCGGAGAAGCC-3’	5’-GCACCTCCACCTCCAGCTGGC-3’
